# Supplementary material for: Genome wide association and gene enrichment analysis reveal membrane anchoring and structural proteins associated with meat quality in beef
Source: BMC Genomics. 2019 Feb 21;20:151. doi: 10.1186/s12864-019-5518-3 (PMC6385435; doi:10.1186/s12864-019-5518-3)
Supplement: Supplementary file 12 — List with 10,919 genes reported as expressed in bovine skeletal muscle by the EMBL-EBI Expression Atlas. A gene was considered as expressed in bovine skeletal muscle if it was present in E-MTAB-2798 or E-MTAB-2596 assays. This list was used as background list for the tissue restricted gene enrichment analysis. (XLS 875 kb) [file 12864_2019_5518_MOESM12_ESM.xls]

## Sheet: Additional file 12
Gene name	ensembl gene ID
CYP17A1	ENSBTAG00000014335
DCSTAMP	ENSBTAG00000021240
ENSBTAG00000000237	ENSBTAG00000000237
ENSBTAG00000003389	ENSBTAG00000003389
ENSBTAG00000010072	ENSBTAG00000010072
ENSBTAG00000014988	ENSBTAG00000014988
ENSBTAG00000033890	ENSBTAG00000033890
ENSBTAG00000039263	ENSBTAG00000039263
ENSBTAG00000046595	ENSBTAG00000046595
ENSBTAG00000046690	ENSBTAG00000046690
ENSBTAG00000047048	ENSBTAG00000047048
ENSBTAG00000047471	ENSBTAG00000047471
ENSBTAG00000047771	ENSBTAG00000047771
ENSBTAG00000048177	ENSBTAG00000048177
KCTD4	ENSBTAG00000019416
LRRC18	ENSBTAG00000005996
LRRC46	ENSBTAG00000001830
LRRC56	ENSBTAG00000048263
MUC15	ENSBTAG00000027126
P2RY12	ENSBTAG00000015837
PPP1R14C	ENSBTAG00000026586
TMEM217	ENSBTAG00000002369
ZSCAN23	ENSBTAG00000037965
ABCB11	ENSBTAG00000026885
ABCG4	ENSBTAG00000011800
ACSBG1	ENSBTAG00000006231
ACSM4	ENSBTAG00000046098
ACTL7A	ENSBTAG00000019468
ACTN2	ENSBTAG00000009696
ADAM12	ENSBTAG00000012444
ADAM32	ENSBTAG00000023146
ADAMTS20	ENSBTAG00000000395
ADAMTS3	ENSBTAG00000006507
ADAMTSL2	ENSBTAG00000007492
ADAMTSL3	ENSBTAG00000004645
ADCYAP1	ENSBTAG00000020650
ADIPOQ	ENSBTAG00000019813
ADRA1A	ENSBTAG00000031632
ADRA1D	ENSBTAG00000019504
ADRB3	ENSBTAG00000017981
AGXT	ENSBTAG00000005797
AHRR	ENSBTAG00000026527
AHSG	ENSBTAG00000000522
AK9	ENSBTAG00000010116
AKR1E2	ENSBTAG00000038260
ALDH1B1	ENSBTAG00000020385
ALDH3A1	ENSBTAG00000021113
ALOX15B	ENSBTAG00000008779
ALPK2	ENSBTAG00000014284
AMBN	ENSBTAG00000004793
ANKAR	ENSBTAG00000012554
ANKEF1	ENSBTAG00000019726
ANKRD35	ENSBTAG00000038844
ANKRD53	ENSBTAG00000010623
ANKUB1	ENSBTAG00000031346
APCDD1L	ENSBTAG00000020397
APOA5	ENSBTAG00000019764
AQP4	ENSBTAG00000019037
ARPP21	ENSBTAG00000007732
ASIC4	ENSBTAG00000020537
ATL1	ENSBTAG00000014312
ATP13A5	ENSBTAG00000018657
ATP2B2	ENSBTAG00000001305
ATP4B	ENSBTAG00000019961
ATP8A2	ENSBTAG00000019529
ATP8B3	ENSBTAG00000020229
AVPR1A	ENSBTAG00000007175
AXDND1	ENSBTAG00000002164
BDNF	ENSBTAG00000008134
BEAN1	ENSBTAG00000009762
BFSP1	ENSBTAG00000021867
BIRC7	ENSBTAG00000004911
BNC2	ENSBTAG00000003669
BOC	ENSBTAG00000013909
BOLL	ENSBTAG00000031614
BPIFB4	ENSBTAG00000038412
BRSK1	ENSBTAG00000015226
BSN	ENSBTAG00000011581
C12orf60	ENSBTAG00000008351
C14orf159	ENSBTAG00000044101
C14orf180	ENSBTAG00000022775
C14orf37	ENSBTAG00000020880
C19orf67	ENSBTAG00000016937
C6orf10	ENSBTAG00000023541
C8A	ENSBTAG00000003774
CA10	ENSBTAG00000034681
CA14	ENSBTAG00000021481
CA5A	ENSBTAG00000010151
CACNA1D	ENSBTAG00000010026
CACNA1S	ENSBTAG00000047491
CACNA2D3	ENSBTAG00000013117
CACNA2D4	ENSBTAG00000021994
CACNG7	ENSBTAG00000007506
CALML5	ENSBTAG00000013854
CAMK1G	ENSBTAG00000016541
CAMK2B	ENSBTAG00000012653
CAMKV	ENSBTAG00000004878
CAND2	ENSBTAG00000015273
CATSPER3	ENSBTAG00000014746
CATSPER4	ENSBTAG00000026638
CATSPERB	ENSBTAG00000018709
CCDC110	ENSBTAG00000017157
CCDC122	ENSBTAG00000034753
CCDC136	ENSBTAG00000011002
CCDC155	ENSBTAG00000008614
CCDC170	ENSBTAG00000004099
CCDC173	ENSBTAG00000001090
CCDC36	ENSBTAG00000009371
CCDC39	ENSBTAG00000001969
CCDC40	ENSBTAG00000016017
CCDC63	ENSBTAG00000032353
CCIN	ENSBTAG00000021696
CCM2L	ENSBTAG00000031453
CD1E	ENSBTAG00000009421
CDA	ENSBTAG00000006136
CDH15	ENSBTAG00000011530
CDH20	ENSBTAG00000001739
CDH22	ENSBTAG00000005672
CDH24	ENSBTAG00000011349
CDH4	ENSBTAG00000015058
CDH9	ENSBTAG00000018234
CEACAM19	ENSBTAG00000015313
CELF5	ENSBTAG00000021774
CELSR3	ENSBTAG00000021846
CERS4	ENSBTAG00000003434
CES5A	ENSBTAG00000011164
CFAP43	ENSBTAG00000014574
CFAP52	ENSBTAG00000017823
CHRNA6	ENSBTAG00000014056
CHST8	ENSBTAG00000047670
CLCA2	ENSBTAG00000038215
CLCN1	ENSBTAG00000009182
CLDN19	ENSBTAG00000017381
CLEC1B	ENSBTAG00000030423
CLIP4	ENSBTAG00000007378
CMTM2	ENSBTAG00000032576
CNDP1	ENSBTAG00000021428
COL26A1	ENSBTAG00000011818
COL4A3	ENSBTAG00000021316
COL8A1	ENSBTAG00000013662
COL9A3	ENSBTAG00000015581
COLQ	ENSBTAG00000040193
COMP	ENSBTAG00000004630
CORIN	ENSBTAG00000002199
CPA1	ENSBTAG00000046169
CPA4	ENSBTAG00000046648
CPNE7	ENSBTAG00000012215
CPNE9	ENSBTAG00000011551
CPO	ENSBTAG00000019190
CRABP2	ENSBTAG00000005716
CREG2	ENSBTAG00000021161
CRISP2	ENSBTAG00000002166
CRISP3	ENSBTAG00000012918
CRYGS	ENSBTAG00000003140
CTXN3	ENSBTAG00000031135
CUX2	ENSBTAG00000008571
CYP11A1	ENSBTAG00000006934
CYP2E1	ENSBTAG00000018365
CYP4F22	ENSBTAG00000047933
DCDC2B	ENSBTAG00000026696
DCLK3	ENSBTAG00000039727
DCST1	ENSBTAG00000010655
DCSTAMP	ENSBTAG00000021240
DDIT4L	ENSBTAG00000010610
DDN	ENSBTAG00000014424
DFNB59	ENSBTAG00000033254
DGKB	ENSBTAG00000021905
DGKI	ENSBTAG00000019980
DHRS7C	ENSBTAG00000005048
DLGAP3	ENSBTAG00000013867
DMGDH	ENSBTAG00000002110
DMRTA2	ENSBTAG00000010414
DNAH11	ENSBTAG00000013078
DNAH17	ENSBTAG00000000920
DNAH3	ENSBTAG00000018560
DNAJB13	ENSBTAG00000003682
DNALI1	ENSBTAG00000002583
DOCK3	ENSBTAG00000001874
DPYSL5	ENSBTAG00000018576
DRD2	ENSBTAG00000010860
DSC1	ENSBTAG00000019876
DSC3	ENSBTAG00000015238
DSCAML1	ENSBTAG00000016692
DSG3	ENSBTAG00000039483
DYRK4	ENSBTAG00000007556
EDN2	ENSBTAG00000021434
EFCAB6	ENSBTAG00000030189
ELAVL4	ENSBTAG00000021046
ENSBTAG00000002247	ENSBTAG00000002247
ENSBTAG00000002355	ENSBTAG00000002355
ENSBTAG00000002955	ENSBTAG00000002955
ENSBTAG00000003244	ENSBTAG00000003244
ENSBTAG00000003389	ENSBTAG00000003389
ENSBTAG00000003560	ENSBTAG00000003560
ENSBTAG00000003621	ENSBTAG00000003621
ENSBTAG00000004212	ENSBTAG00000004212
ENSBTAG00000005972	ENSBTAG00000005972
ENSBTAG00000006239	ENSBTAG00000006239
ENSBTAG00000007350	ENSBTAG00000007350
ENSBTAG00000007392	ENSBTAG00000007392
ENSBTAG00000007820	ENSBTAG00000007820
ENSBTAG00000008324	ENSBTAG00000008324
ENSBTAG00000008491	ENSBTAG00000008491
ENSBTAG00000008564	ENSBTAG00000008564
ENSBTAG00000009171	ENSBTAG00000009171
ENSBTAG00000011213	ENSBTAG00000011213
ENSBTAG00000011654	ENSBTAG00000011654
ENSBTAG00000012693	ENSBTAG00000012693
ENSBTAG00000012793	ENSBTAG00000012793
ENSBTAG00000013529	ENSBTAG00000013529
ENSBTAG00000013820	ENSBTAG00000013820
ENSBTAG00000014332	ENSBTAG00000014332
ENSBTAG00000015175	ENSBTAG00000015175
ENSBTAG00000015493	ENSBTAG00000015493
ENSBTAG00000015792	ENSBTAG00000015792
ENSBTAG00000016370	ENSBTAG00000016370
ENSBTAG00000018218	ENSBTAG00000018218
ENSBTAG00000018713	ENSBTAG00000018713
ENSBTAG00000021359	ENSBTAG00000021359
ENSBTAG00000021529	ENSBTAG00000021529
ENSBTAG00000021882	ENSBTAG00000021882
ENSBTAG00000022829	ENSBTAG00000022829
ENSBTAG00000023187	ENSBTAG00000023187
ENSBTAG00000024548	ENSBTAG00000024548
ENSBTAG00000025621	ENSBTAG00000025621
ENSBTAG00000026340	ENSBTAG00000026340
ENSBTAG00000026637	ENSBTAG00000026637
ENSBTAG00000027274	ENSBTAG00000027274
ENSBTAG00000027279	ENSBTAG00000027279
ENSBTAG00000027832	ENSBTAG00000027832
ENSBTAG00000027899	ENSBTAG00000027899
ENSBTAG00000027974	ENSBTAG00000027974
ENSBTAG00000030922	ENSBTAG00000030922
ENSBTAG00000032859	ENSBTAG00000032859
ENSBTAG00000033506	ENSBTAG00000033506
ENSBTAG00000034678	ENSBTAG00000034678
ENSBTAG00000036102	ENSBTAG00000036102
ENSBTAG00000037531	ENSBTAG00000037531
ENSBTAG00000037537	ENSBTAG00000037537
ENSBTAG00000037770	ENSBTAG00000037770
ENSBTAG00000037890	ENSBTAG00000037890
ENSBTAG00000038327	ENSBTAG00000038327
ENSBTAG00000038444	ENSBTAG00000038444
ENSBTAG00000038486	ENSBTAG00000038486
ENSBTAG00000038598	ENSBTAG00000038598
ENSBTAG00000038978	ENSBTAG00000038978
ENSBTAG00000039041	ENSBTAG00000039041
ENSBTAG00000039052	ENSBTAG00000039052
ENSBTAG00000039847	ENSBTAG00000039847
ENSBTAG00000039978	ENSBTAG00000039978
ENSBTAG00000040038	ENSBTAG00000040038
ENSBTAG00000040187	ENSBTAG00000040187
ENSBTAG00000040222	ENSBTAG00000040222
ENSBTAG00000040349	ENSBTAG00000040349
ENSBTAG00000040450	ENSBTAG00000040450
ENSBTAG00000045589	ENSBTAG00000045589
ENSBTAG00000045689	ENSBTAG00000045689
ENSBTAG00000045746	ENSBTAG00000045746
ENSBTAG00000045768	ENSBTAG00000045768
ENSBTAG00000046447	ENSBTAG00000046447
ENSBTAG00000046727	ENSBTAG00000046727
ENSBTAG00000046901	ENSBTAG00000046901
ENSBTAG00000046953	ENSBTAG00000046953
ENSBTAG00000047014	ENSBTAG00000047014
ENSBTAG00000047099	ENSBTAG00000047099
ENSBTAG00000047264	ENSBTAG00000047264
ENSBTAG00000047316	ENSBTAG00000047316
ENSBTAG00000047324	ENSBTAG00000047324
ENSBTAG00000047344	ENSBTAG00000047344
ENSBTAG00000047375	ENSBTAG00000047375
ENSBTAG00000047414	ENSBTAG00000047414
ENSBTAG00000047442	ENSBTAG00000047442
ENSBTAG00000047473	ENSBTAG00000047473
ENSBTAG00000047511	ENSBTAG00000047511
ENSBTAG00000047520	ENSBTAG00000047520
ENSBTAG00000047585	ENSBTAG00000047585
ENSBTAG00000047595	ENSBTAG00000047595
ENSBTAG00000047625	ENSBTAG00000047625
ENSBTAG00000048078	ENSBTAG00000048078
ENSBTAG00000048096	ENSBTAG00000048096
ENSBTAG00000048153	ENSBTAG00000048153
ENTHD1	ENSBTAG00000000326
EPHA10	ENSBTAG00000020510
EPHA7	ENSBTAG00000021420
ESR2	ENSBTAG00000004498
ESRRG	ENSBTAG00000010392
ETNPPL	ENSBTAG00000010284
EXD1	ENSBTAG00000008363
FAM124B	ENSBTAG00000038700
FAM155A	ENSBTAG00000025220
FAM163A	ENSBTAG00000021492
FAM186B	ENSBTAG00000019283
FAM92B	ENSBTAG00000020836
FAP	ENSBTAG00000008140
FAT2	ENSBTAG00000003498
FBLN7	ENSBTAG00000009230
FBN3	ENSBTAG00000000595
FBXL16	ENSBTAG00000019008
FBXO47	ENSBTAG00000024983
FCRL6	ENSBTAG00000017786
FGB	ENSBTAG00000022120
FGF1	ENSBTAG00000005198
FHAD1	ENSBTAG00000002408
FHL5	ENSBTAG00000001803
FHOD3	ENSBTAG00000021581
FNDC5	ENSBTAG00000002184
FOXC2	ENSBTAG00000012465
FREM1	ENSBTAG00000020141
FRS3	ENSBTAG00000009861
FSIP1	ENSBTAG00000012015
FZD10	ENSBTAG00000007047
GABRR1	ENSBTAG00000011672
GALNT13	ENSBTAG00000005562
GALNT14	ENSBTAG00000021735
GCGR	ENSBTAG00000003786
GGT6	ENSBTAG00000007436
GIF	ENSBTAG00000012057
GJA8	ENSBTAG00000021833
GJC2	ENSBTAG00000014916
GLIPR1L1	ENSBTAG00000004569
GLTPD2	ENSBTAG00000048034
GLYAT	ENSBTAG00000038323
GNB3	ENSBTAG00000016043
GOT1L1	ENSBTAG00000016446
GP5	ENSBTAG00000013203
GPC5	ENSBTAG00000008708
GPR137C	ENSBTAG00000000821
GPR15	ENSBTAG00000020997
GPR52	ENSBTAG00000038189
GPR6	ENSBTAG00000002868
GPR63	ENSBTAG00000002915
GPR75	ENSBTAG00000000102
GPR85	ENSBTAG00000032844
GRID1	ENSBTAG00000019623
GRIK2	ENSBTAG00000033153
GRIK3	ENSBTAG00000009269
GRIN2A	ENSBTAG00000007887
GRIN2D	ENSBTAG00000023369
GRIN3A	ENSBTAG00000018445
GRM7	ENSBTAG00000013047
GTSF1	ENSBTAG00000018085
H1FOO	ENSBTAG00000001812
HEATR9	ENSBTAG00000002850
HGD	ENSBTAG00000015895
HIPK4	ENSBTAG00000040067
HMGA2	ENSBTAG00000044118
HMGCLL1	ENSBTAG00000025718
HOXB4	ENSBTAG00000039599
HS3ST2	ENSBTAG00000017391
HS3ST5	ENSBTAG00000000188
HSD17B3	ENSBTAG00000016867
HSF5	ENSBTAG00000001166
IFITM10	ENSBTAG00000047996
IFNG	ENSBTAG00000012529
IGSF11	ENSBTAG00000045704
IL17	ENSBTAG00000002150
IL17F	ENSBTAG00000016835
IL19	ENSBTAG00000006692
IL22RA2	ENSBTAG00000017000
IL36RN	ENSBTAG00000039839
IL37	ENSBTAG00000013675
IL5RA	ENSBTAG00000000273
IL9R	ENSBTAG00000007558
INA	ENSBTAG00000002717
INHBC	ENSBTAG00000019084
IQCH	ENSBTAG00000013638
IQUB	ENSBTAG00000004405
ISLR2	ENSBTAG00000002661
KCNB1	ENSBTAG00000027320
KCNB2	ENSBTAG00000040496
KCNC4	ENSBTAG00000007352
KCND2	ENSBTAG00000032077
KCNE2	ENSBTAG00000026260
KCNE4	ENSBTAG00000006432
KCNH4	ENSBTAG00000001195
KCNIP2	ENSBTAG00000016343
KCNJ10	ENSBTAG00000002414
KCNJ14	ENSBTAG00000000082
KCNK10	ENSBTAG00000019355
KCNK9	ENSBTAG00000047488
KCNN1	ENSBTAG00000008626
KCNN2	ENSBTAG00000011076
KCNQ3	ENSBTAG00000020667
KCNQ4	ENSBTAG00000002644
KCNV2	ENSBTAG00000017884
KIAA0319	ENSBTAG00000021903
KIAA0895	ENSBTAG00000002011
KIAA1644	ENSBTAG00000003574
KIAA2012	ENSBTAG00000034192
KIF17	ENSBTAG00000017644
KIF1A	ENSBTAG00000011538
KIF26A	ENSBTAG00000021904
KIF5A	ENSBTAG00000021336
KIRREL3	ENSBTAG00000006804
KLB	ENSBTAG00000014517
KLHL1	ENSBTAG00000008647
KLHL33	ENSBTAG00000001183
KLRG2	ENSBTAG00000017793
KRT17	ENSBTAG00000006806
KRT80	ENSBTAG00000007204
LDHC	ENSBTAG00000002488
LGI2	ENSBTAG00000017390
LGR6	ENSBTAG00000004789
LHFPL3	ENSBTAG00000000189
LRRC10	ENSBTAG00000019157
LRRC15	ENSBTAG00000038600
LRRC39	ENSBTAG00000015786
LRRC69	ENSBTAG00000006004
LRRD1	ENSBTAG00000001571
LRRN1	ENSBTAG00000001176
LYPD5	ENSBTAG00000037888
MACROD2	ENSBTAG00000034441
MAG	ENSBTAG00000017044
MAGEL2	ENSBTAG00000045998
MAP6	ENSBTAG00000001028
MAPK10	ENSBTAG00000020048
MATN1	ENSBTAG00000003479
MATN3	ENSBTAG00000020893
MBOAT4	ENSBTAG00000000743
MCMDC2	ENSBTAG00000000620
MDGA2	ENSBTAG00000005697
MEI1	ENSBTAG00000004488
MEOX2	ENSBTAG00000003238
MEX3A	ENSBTAG00000019158
MGAT4D	ENSBTAG00000034281
MGAT5B	ENSBTAG00000005104
MIXL1	ENSBTAG00000002139
MMP13	ENSBTAG00000015059
MMP17	ENSBTAG00000002145
MPL	ENSBTAG00000003781
MPO	ENSBTAG00000011616
MPP3	ENSBTAG00000017536
MPPED2	ENSBTAG00000020956
MPZ	ENSBTAG00000033835
MROH2A	ENSBTAG00000017434
MS4A13	ENSBTAG00000030898
MSH4	ENSBTAG00000018448
MUSK	ENSBTAG00000002744
MYBPC3	ENSBTAG00000021707
MYO18B	ENSBTAG00000000698
MYOZ3	ENSBTAG00000025136
MYT1	ENSBTAG00000006352
NALCN	ENSBTAG00000037786
NDST3	ENSBTAG00000007316
NEB	ENSBTAG00000006907
NEFL	ENSBTAG00000021949
NEK11	ENSBTAG00000009258
NEK5	ENSBTAG00000019134
NFE2	ENSBTAG00000001562
NKX3-1	ENSBTAG00000001221
NME8	ENSBTAG00000015353
NOBOX	ENSBTAG00000009832
NOS1	ENSBTAG00000002023
NOX5	ENSBTAG00000009030
NPFFR2	ENSBTAG00000009070
NPHS1	ENSBTAG00000007821
NPPA	ENSBTAG00000006709
NPSR1	ENSBTAG00000013768
NPTXR	ENSBTAG00000000109
NPY	ENSBTAG00000004503
NRIP3	ENSBTAG00000013366
NTM	ENSBTAG00000010032
NWD2	ENSBTAG00000001491
NXNL2	ENSBTAG00000019958
OAS2	ENSBTAG00000014628
OCA2	ENSBTAG00000009831
ODF3L1	ENSBTAG00000019506
OLFM1	ENSBTAG00000038584
OLR1	ENSBTAG00000004547
OR1G1	ENSBTAG00000039018
OR52B2	ENSBTAG00000021590
OR5AU1	ENSBTAG00000018919
OR6F1	ENSBTAG00000031412
OR6S1	ENSBTAG00000039241
OR9I1	ENSBTAG00000039893
OR9Q2	ENSBTAG00000030908
OSBP2	ENSBTAG00000019146
OSTN	ENSBTAG00000018703
OTOA	ENSBTAG00000018870
OVCH1	ENSBTAG00000005365
OVCH2	ENSBTAG00000037921
P2RX3	ENSBTAG00000000376
PADI4	ENSBTAG00000012052
PAMR1	ENSBTAG00000012630
PANX2	ENSBTAG00000009297
PAX8	ENSBTAG00000019354
PCDHB14	ENSBTAG00000007349
PDE11A	ENSBTAG00000016396
PDE6B	ENSBTAG00000017480
PEG10	ENSBTAG00000038093
PEX5L	ENSBTAG00000013219
PIF1	ENSBTAG00000007638
PINLYP	ENSBTAG00000001260
PNPLA1	ENSBTAG00000015118
PODXL2	ENSBTAG00000018031
PPFIA2	ENSBTAG00000003036
PPP1R14C	ENSBTAG00000026586
PRMT8	ENSBTAG00000009447
PROC	ENSBTAG00000003950
PRODH2	ENSBTAG00000031772
PROKR2	ENSBTAG00000015872
PROM2	ENSBTAG00000001952
PRPH2	ENSBTAG00000005971
PRR19	ENSBTAG00000013283
PRRT3	ENSBTAG00000010836
PRRX1	ENSBTAG00000004570
PRSS22	ENSBTAG00000020582
PRSS57	ENSBTAG00000021616
PSD2	ENSBTAG00000000238
PTH2R	ENSBTAG00000011992
QRICH2	ENSBTAG00000030173
RADIL	ENSBTAG00000030690
RASGRF1	ENSBTAG00000019940
RBM20	ENSBTAG00000023891
REC8	ENSBTAG00000002705
REM2	ENSBTAG00000016381
REN	ENSBTAG00000021333
RGS20	ENSBTAG00000003454
RGS22	ENSBTAG00000019793
RHCG	ENSBTAG00000005471
RIBC2	ENSBTAG00000003594
RIMS1	ENSBTAG00000020238
RIMS2	ENSBTAG00000003827
RLBP1	ENSBTAG00000033721
RNF182	ENSBTAG00000045884
ROPN1L	ENSBTAG00000003539
RRH	ENSBTAG00000000751
RXFP1	ENSBTAG00000010306
RYR1	ENSBTAG00000006999
RYR2	ENSBTAG00000022886
RYR3	ENSBTAG00000025642
SAA4	ENSBTAG00000002963
SAMD3	ENSBTAG00000021361
SCN3A	ENSBTAG00000019385
SCN8A	ENSBTAG00000021339
SCN9A	ENSBTAG00000002425
SCNN1B	ENSBTAG00000012290
SCNN1G	ENSBTAG00000010163
SCP2D1	ENSBTAG00000005202
SDR42E2	ENSBTAG00000013052
SEBOX	ENSBTAG00000033270
SEC14L3	ENSBTAG00000014464
SELE	ENSBTAG00000007307
SEMA5B	ENSBTAG00000018765
SGCA	ENSBTAG00000003956
SH2D4B	ENSBTAG00000003910
SH3TC2	ENSBTAG00000017151
SHC2	ENSBTAG00000016072
SLC11A1	ENSBTAG00000015520
SLC12A5	ENSBTAG00000014179
SLC13A5	ENSBTAG00000004680
SLC22A1	ENSBTAG00000008540
SLC22A11	ENSBTAG00000018792
SLC24A1	ENSBTAG00000025826
SLC24A4	ENSBTAG00000006620
SLC25A31	ENSBTAG00000012826
SLC26A9	ENSBTAG00000001382
SLC30A2	ENSBTAG00000006355
SLC34A2	ENSBTAG00000001545
SLC35F3	ENSBTAG00000020361
SLC36A3	ENSBTAG00000006624
SLC38A8	ENSBTAG00000040086
SLC4A5	ENSBTAG00000004884
SLC4A9	ENSBTAG00000021775
SLC6A1	ENSBTAG00000005857
SLC6A11	ENSBTAG00000038962
SLC6A12	ENSBTAG00000038415
SLC6A17	ENSBTAG00000001981
SLC6A2	ENSBTAG00000003353
SLC8A3	ENSBTAG00000027080
SLIT1	ENSBTAG00000043991
SNAI1	ENSBTAG00000014554
SNAP91	ENSBTAG00000009355
SNPH	ENSBTAG00000031278
SNX31	ENSBTAG00000011271
SPAG4	ENSBTAG00000006949
SPATA25	ENSBTAG00000000960
SPATA32	ENSBTAG00000007083
SPATC1	ENSBTAG00000026350
SPEF1	ENSBTAG00000006578
SPEF2	ENSBTAG00000023529
SPEG	ENSBTAG00000046176
SPHKAP	ENSBTAG00000021328
SPO11	ENSBTAG00000044210
SPTA1	ENSBTAG00000000888
SPTBN5	ENSBTAG00000006790
SRRM3	ENSBTAG00000007879
SSC4D	ENSBTAG00000003020
ST6GAL2	ENSBTAG00000000703
ST6GALNAC5	ENSBTAG00000007309
STARD6	ENSBTAG00000008168
STK33	ENSBTAG00000011910
STKLD1	ENSBTAG00000004140
STMN4	ENSBTAG00000017627
SULT4A1	ENSBTAG00000006273
SV2A	ENSBTAG00000001599
SYCP1	ENSBTAG00000032071
SYN3	ENSBTAG00000020636
SYNDIG1L	ENSBTAG00000004218
SYNGR4	ENSBTAG00000008546
SYPL2	ENSBTAG00000015470
TACR3	ENSBTAG00000016247
TACSTD2	ENSBTAG00000004381
TBATA	ENSBTAG00000021180
TCF15	ENSBTAG00000005750
TCF23	ENSBTAG00000014813
TDRD1	ENSBTAG00000006855
TDRD6	ENSBTAG00000009978
TENM4	ENSBTAG00000007439
TEX101	ENSBTAG00000016777
TFAP2C	ENSBTAG00000002065
TG	ENSBTAG00000007823
TGM1	ENSBTAG00000003920
TGM7	ENSBTAG00000015412
THBS4	ENSBTAG00000012866
THEG	ENSBTAG00000040485
THRSP	ENSBTAG00000011666
TIGD3	ENSBTAG00000003079
TKTL2	ENSBTAG00000008947
TMCC2	ENSBTAG00000002361
TMEM130	ENSBTAG00000005679
TMEM132E	ENSBTAG00000002680
TMEM200C	ENSBTAG00000046396
TMEM202	ENSBTAG00000025814
TMEM213	ENSBTAG00000001527
TMEM88B	ENSBTAG00000023784
TMEM8C	ENSBTAG00000013242
TMIGD1	ENSBTAG00000002609
TNFRSF8	ENSBTAG00000039937
TNN	ENSBTAG00000015650
TRIM46	ENSBTAG00000010622
TRIM66	ENSBTAG00000020890
TRPC3	ENSBTAG00000019021
TRPC6	ENSBTAG00000011227
TRPM5	ENSBTAG00000046662
TRPM8	ENSBTAG00000014652
TRPV3	ENSBTAG00000000020
TSGA10IP	ENSBTAG00000003093
TSPEAR	ENSBTAG00000018607
TSSK4	ENSBTAG00000002710
TTC16	ENSBTAG00000013509
TTC25	ENSBTAG00000013698
TULP1	ENSBTAG00000034287
TWIST2	ENSBTAG00000021444
UNC13A	ENSBTAG00000012682
UNC45B	ENSBTAG00000002898
UNC5A	ENSBTAG00000014897
UNC80	ENSBTAG00000015415
UPK1A	ENSBTAG00000020543
USP44	ENSBTAG00000019946
USP50	ENSBTAG00000011929
VANGL2	ENSBTAG00000006560
VAT1L	ENSBTAG00000018146
VGLL3	ENSBTAG00000026156
VSIG8	ENSBTAG00000010670
WBSCR28	ENSBTAG00000014810
WDR27	ENSBTAG00000009620
WDR66	ENSBTAG00000004187
WDR93	ENSBTAG00000006141
XKR4	ENSBTAG00000044050
XKR5	ENSBTAG00000007473
XKR7	ENSBTAG00000016348
YIPF7	ENSBTAG00000001603
YJEFN3	ENSBTAG00000014968
ZFPM2	ENSBTAG00000001649
ZKSCAN2	ENSBTAG00000011162
ZNF114	ENSBTAG00000047616
ZNF772	ENSBTAG00000040358
ZP2	ENSBTAG00000011504
ZPBP	ENSBTAG00000005499
ANGPTL3	ENSBTAG00000021386
ENSBTAG00000001836	ENSBTAG00000001836
ENSBTAG00000019880	ENSBTAG00000019880
ENSBTAG00000046250	ENSBTAG00000046250
ENSBTAG00000046682	ENSBTAG00000046682
ENSBTAG00000047258	ENSBTAG00000047258
ENSBTAG00000047858	ENSBTAG00000047858
ENSBTAG00000047907	ENSBTAG00000047907
ENSBTAG00000048006	ENSBTAG00000048006
ENSBTAG00000048042	ENSBTAG00000048042
FAM196A	ENSBTAG00000021015
GFI1B	ENSBTAG00000012772
GPR21	ENSBTAG00000040296
LRRTM3	ENSBTAG00000016885
SLC26A1	ENSBTAG00000007001
SPINK7	ENSBTAG00000044183
AADACL3	ENSBTAG00000015373
AARD	ENSBTAG00000032738
AATK	ENSBTAG00000019049
ABCA10	ENSBTAG00000006937
ABCA2	ENSBTAG00000047254
ABCC11	ENSBTAG00000010858
ACACB	ENSBTAG00000022058
ACVR1C	ENSBTAG00000019337
ADAM20	ENSBTAG00000038377
ADAMTS12	ENSBTAG00000012558
ADAMTS8	ENSBTAG00000010411
ADCYAP1R1	ENSBTAG00000020247
ADRA1B	ENSBTAG00000040253
AGBL3	ENSBTAG00000013976
AK5	ENSBTAG00000017411
AKAP6	ENSBTAG00000017719
ALDH3B2	ENSBTAG00000012054
ALOX15	ENSBTAG00000011990
AMZ1	ENSBTAG00000026194
APC2	ENSBTAG00000015433
ARHGAP23	ENSBTAG00000016911
ARL11	ENSBTAG00000016998
ASPG	ENSBTAG00000017194
ATCAY	ENSBTAG00000018375
ATP1A2	ENSBTAG00000010551
B3GNT4	ENSBTAG00000004197
BAIAP3	ENSBTAG00000014100
BEND4	ENSBTAG00000005567
BEND6	ENSBTAG00000008228
BTBD16	ENSBTAG00000008819
C7orf31	ENSBTAG00000019445
C8B	ENSBTAG00000003775
CACNA1G	ENSBTAG00000009835
CACNA2D2	ENSBTAG00000009489
CALR3	ENSBTAG00000033222
CAMTA1	ENSBTAG00000014602
CAPN3	ENSBTAG00000008868
CAPS2	ENSBTAG00000014859
CASC1	ENSBTAG00000002972
CATSPER2	ENSBTAG00000032130
CBLN4	ENSBTAG00000017524
CCDC141	ENSBTAG00000027875
CCDC146	ENSBTAG00000009341
CCDC154	ENSBTAG00000000568
CCDC159	ENSBTAG00000032292
CCDC42	ENSBTAG00000018416
CCDC60	ENSBTAG00000004693
CCDC62	ENSBTAG00000003527
CCDC7	ENSBTAG00000002675
CCDC73	ENSBTAG00000032151
CCDC83	ENSBTAG00000011132
CDH23	ENSBTAG00000021497
CDHR1	ENSBTAG00000001231
CDRT4	ENSBTAG00000031084
CEND1	ENSBTAG00000001228
CES4A	ENSBTAG00000038325
CHCHD6	ENSBTAG00000030855
CHRD	ENSBTAG00000002878
CHRNA5	ENSBTAG00000013657
CHSY3	ENSBTAG00000014661
CKLF	ENSBTAG00000038858
CKM	ENSBTAG00000013921
CLEC4D	ENSBTAG00000039347
CLSTN2	ENSBTAG00000008714
CMYA5	ENSBTAG00000006823
CNTN2	ENSBTAG00000014645
COL4A4	ENSBTAG00000021310
CPAMD8	ENSBTAG00000009331
CPB2	ENSBTAG00000007073
CPT1C	ENSBTAG00000012205
CRISPLD1	ENSBTAG00000004411
CSTA	ENSBTAG00000010688
CYP24A1	ENSBTAG00000002765
DACT2	ENSBTAG00000031532
DENND2C	ENSBTAG00000012194
DLEC1	ENSBTAG00000008567
DLGAP1	ENSBTAG00000005372
DNAJC6	ENSBTAG00000030749
DOK6	ENSBTAG00000046957
DPEP3	ENSBTAG00000002824
DPYSL4	ENSBTAG00000017780
DRC1	ENSBTAG00000009649
DUOXA1	ENSBTAG00000016242
DUSP26	ENSBTAG00000016413
EFNA2	ENSBTAG00000038221
EFS	ENSBTAG00000038733
EML6	ENSBTAG00000011101
ENAM	ENSBTAG00000010346
ENOX1	ENSBTAG00000012434
ENSBTAG00000000580	ENSBTAG00000000580
ENSBTAG00000005429	ENSBTAG00000005429
ENSBTAG00000006497	ENSBTAG00000006497
ENSBTAG00000007286	ENSBTAG00000007286
ENSBTAG00000008786	ENSBTAG00000008786
ENSBTAG00000009783	ENSBTAG00000009783
ENSBTAG00000011441	ENSBTAG00000011441
ENSBTAG00000012692	ENSBTAG00000012692
ENSBTAG00000013836	ENSBTAG00000013836
ENSBTAG00000016148	ENSBTAG00000016148
ENSBTAG00000018356	ENSBTAG00000018356
ENSBTAG00000019547	ENSBTAG00000019547
ENSBTAG00000023986	ENSBTAG00000023986
ENSBTAG00000024021	ENSBTAG00000024021
ENSBTAG00000027172	ENSBTAG00000027172
ENSBTAG00000027513	ENSBTAG00000027513
ENSBTAG00000032432	ENSBTAG00000032432
ENSBTAG00000033122	ENSBTAG00000033122
ENSBTAG00000033515	ENSBTAG00000033515
ENSBTAG00000033837	ENSBTAG00000033837
ENSBTAG00000038267	ENSBTAG00000038267
ENSBTAG00000038322	ENSBTAG00000038322
ENSBTAG00000038510	ENSBTAG00000038510
ENSBTAG00000038797	ENSBTAG00000038797
ENSBTAG00000038893	ENSBTAG00000038893
ENSBTAG00000039111	ENSBTAG00000039111
ENSBTAG00000039170	ENSBTAG00000039170
ENSBTAG00000039470	ENSBTAG00000039470
ENSBTAG00000040046	ENSBTAG00000040046
ENSBTAG00000045993	ENSBTAG00000045993
ENSBTAG00000046199	ENSBTAG00000046199
ENSBTAG00000046486	ENSBTAG00000046486
ENSBTAG00000046753	ENSBTAG00000046753
ENSBTAG00000046963	ENSBTAG00000046963
ENSBTAG00000047312	ENSBTAG00000047312
ENSBTAG00000047979	ENSBTAG00000047979
ENSBTAG00000048013	ENSBTAG00000048013
ESR1	ENSBTAG00000007159
ESYT3	ENSBTAG00000008111
FABP7	ENSBTAG00000033803
FAM170B	ENSBTAG00000047402
FBXO24	ENSBTAG00000003169
FER1L5	ENSBTAG00000003963
FIBIN	ENSBTAG00000006676
FNDC7	ENSBTAG00000046771
GABRB3	ENSBTAG00000013422
GC	ENSBTAG00000013718
GLDC	ENSBTAG00000025903
GLI2	ENSBTAG00000011682
GLRB	ENSBTAG00000021764
GNG4	ENSBTAG00000002908
GNRH1	ENSBTAG00000000164
GPAT2	ENSBTAG00000011558
GPHA2	ENSBTAG00000007063
GPR1	ENSBTAG00000017043
GPR142	ENSBTAG00000013959
GPR153	ENSBTAG00000013071
GPR83	ENSBTAG00000008923
GPRIN1	ENSBTAG00000044035
GRIK5	ENSBTAG00000011723
GRXCR1	ENSBTAG00000032947
HAPLN3	ENSBTAG00000001740
HECTD2	ENSBTAG00000011651
HHIPL2	ENSBTAG00000017561
HIVEP3	ENSBTAG00000020745
HOGA1	ENSBTAG00000012721
HPCAL4	ENSBTAG00000014538
HSPB9	ENSBTAG00000024979
HTRA4	ENSBTAG00000019532
ICA1L	ENSBTAG00000008673
IKZF4	ENSBTAG00000012636
IL18RAP	ENSBTAG00000033748
IL21	ENSBTAG00000012368
IL4	ENSBTAG00000015957
IZUMO4	ENSBTAG00000025448
JAKMIP3	ENSBTAG00000000951
KATNAL2	ENSBTAG00000019331
KCND3	ENSBTAG00000031654
KCNH1	ENSBTAG00000008710
KCNH3	ENSBTAG00000019277
KCNH8	ENSBTAG00000012798
KCNJ11	ENSBTAG00000016170
KCNJ16	ENSBTAG00000024903
KCNMB3	ENSBTAG00000009235
KIAA1024L	ENSBTAG00000048309
KIAA1614	ENSBTAG00000006260
KIF5C	ENSBTAG00000018125
KIR2DS1	ENSBTAG00000045795
KIRREL2	ENSBTAG00000007826
KLHL38	ENSBTAG00000016754
KLK10	ENSBTAG00000015129
KRBA1	ENSBTAG00000010219
KRT12	ENSBTAG00000015518
KRT78	ENSBTAG00000039967
LCTL	ENSBTAG00000005214
LGALS12	ENSBTAG00000007108
LHX6	ENSBTAG00000005525
LIPJ	ENSBTAG00000038063
LMTK3	ENSBTAG00000012016
LRP8	ENSBTAG00000000736
LTA	ENSBTAG00000000016
LTB4R2	ENSBTAG00000040056
LYG2	ENSBTAG00000002582
MAATS1	ENSBTAG00000001293
MAT1A	ENSBTAG00000005963
MCCD1	ENSBTAG00000045577
MCHR1	ENSBTAG00000004048
ME3	ENSBTAG00000000246
MEFV	ENSBTAG00000019123
METRN	ENSBTAG00000020198
MPP2	ENSBTAG00000001279
MS4A15	ENSBTAG00000039461
MSX1	ENSBTAG00000010875
MTUS2	ENSBTAG00000001094
MUC5B	ENSBTAG00000008274
MYBPC1	ENSBTAG00000011392
MYH2	ENSBTAG00000007090
MYH7	ENSBTAG00000009703
MYL2	ENSBTAG00000018369
MYO7A	ENSBTAG00000003955
MYOM1	ENSBTAG00000019585
MYOZ2	ENSBTAG00000002574
NAALADL1	ENSBTAG00000002249
NCR1	ENSBTAG00000045529
NDRG4	ENSBTAG00000003894
NEUROD4	ENSBTAG00000005626
NEUROG2	ENSBTAG00000015259
NFASC	ENSBTAG00000045895
NIPAL4	ENSBTAG00000020213
NOL4	ENSBTAG00000010299
NPVF	ENSBTAG00000019447
NPY1R	ENSBTAG00000047586
NPY5R	ENSBTAG00000038421
NRSN2	ENSBTAG00000027387
NTS	ENSBTAG00000005305
ODF1	ENSBTAG00000003445
OMD	ENSBTAG00000011836
OPRD1	ENSBTAG00000003202
OR2K2	ENSBTAG00000010686
P2RX6	ENSBTAG00000019244
P4HA3	ENSBTAG00000006579
PCDHB7	ENSBTAG00000046262
PCP2	ENSBTAG00000008906
PDE6C	ENSBTAG00000000445
PDYN	ENSBTAG00000045520
PDZD2	ENSBTAG00000014455
PGLYRP2	ENSBTAG00000012280
PHACTR3	ENSBTAG00000015080
PHF7	ENSBTAG00000047658
PKD2L1	ENSBTAG00000010742
PLCD4	ENSBTAG00000003809
PLEKHG7	ENSBTAG00000000818
PLIN4	ENSBTAG00000015690
PNMA2	ENSBTAG00000037986
POU2F3	ENSBTAG00000021340
PPM1E	ENSBTAG00000010788
PRG4	ENSBTAG00000011932
PROX2	ENSBTAG00000015052
PRX	ENSBTAG00000017333
PTGDR	ENSBTAG00000006703
PTPDC1	ENSBTAG00000005803
QPCT	ENSBTAG00000013923
RAET1G	ENSBTAG00000039329
RBM11	ENSBTAG00000034347
RBM46	ENSBTAG00000001696
RFX2	ENSBTAG00000017661
RGS21	ENSBTAG00000037494
RGS7	ENSBTAG00000005410
RGS7BP	ENSBTAG00000005169
RHBDL3	ENSBTAG00000020992
RIMBP2	ENSBTAG00000009797
RIPPLY3	ENSBTAG00000036019
RNASE13	ENSBTAG00000046189
RPS6KL1	ENSBTAG00000006688
S100A8	ENSBTAG00000012640
S1PR5	ENSBTAG00000003544
SAG	ENSBTAG00000021480
SALL4	ENSBTAG00000003101
SAMD14	ENSBTAG00000040521
SAMD15	ENSBTAG00000020471
SATB2	ENSBTAG00000016334
SBSN	ENSBTAG00000015915
SERPINA12	ENSBTAG00000006191
SGIP1	ENSBTAG00000011091
SIGLEC1	ENSBTAG00000013167
SLC10A6	ENSBTAG00000016794
SLC13A4	ENSBTAG00000003864
SLC6A16	ENSBTAG00000030543
SLC6A3	ENSBTAG00000015843
SLC6A9	ENSBTAG00000006043
SLC8A2	ENSBTAG00000010856
SLC9A5	ENSBTAG00000039190
SLCO5A1	ENSBTAG00000032881
SORCS1	ENSBTAG00000007948
SPTB	ENSBTAG00000004732
SRD5A2	ENSBTAG00000003108
SSTR5	ENSBTAG00000039974
ST8SIA5	ENSBTAG00000001770
STPG1	ENSBTAG00000010278
SULT1C3	ENSBTAG00000002803
SYT3	ENSBTAG00000013105
TBC1D21	ENSBTAG00000007800
TBX19	ENSBTAG00000002952
TBX6	ENSBTAG00000009046
TEKT2	ENSBTAG00000021714
TEPP	ENSBTAG00000012785
TFR2	ENSBTAG00000011738
THSD1	ENSBTAG00000020374
TMEFF2	ENSBTAG00000014832
TMEM136	ENSBTAG00000021342
TMEM59L	ENSBTAG00000007698
TMIE	ENSBTAG00000004232
TMPRSS6	ENSBTAG00000032152
TNIP3	ENSBTAG00000047107
TNNT1	ENSBTAG00000006419
TRAV16	ENSBTAG00000040504
TRAV17	ENSBTAG00000022229
TRPC7	ENSBTAG00000014638
TRPM6	ENSBTAG00000033076
TSKS	ENSBTAG00000019179
TSPAN19	ENSBTAG00000047203
TSSK1B	ENSBTAG00000045955
TTC6	ENSBTAG00000015095
TTLL9	ENSBTAG00000005937
TUBA8	ENSBTAG00000018530
VN1R1	ENSBTAG00000047568
VSIG10L	ENSBTAG00000020447
VSTM1	ENSBTAG00000002596
WDR17	ENSBTAG00000014135
WDR78	ENSBTAG00000005442
WDR87	ENSBTAG00000038442
WSCD2	ENSBTAG00000013686
ZBBX	ENSBTAG00000035710
ZC2HC1C	ENSBTAG00000013983
ZNF169	ENSBTAG00000005017
ZNF514	ENSBTAG00000001947
ZNF536	ENSBTAG00000007262
ZNF641	ENSBTAG00000016496
ZNF831	ENSBTAG00000011940
ZNF891	ENSBTAG00000038806
ANKRD61	ENSBTAG00000007372
DNAJB7	ENSBTAG00000006205
DOK7	ENSBTAG00000009742
ENSBTAG00000048150	ENSBTAG00000048150
GCNT7	ENSBTAG00000006243
MCF2L2	ENSBTAG00000010394
SCX	ENSBTAG00000009816
ABCB9	ENSBTAG00000008464
ABCD2	ENSBTAG00000038043
ACOXL	ENSBTAG00000004297
ADAM11	ENSBTAG00000001735
ADAMTS13	ENSBTAG00000015093
ADAMTS18	ENSBTAG00000001010
ADAMTS6	ENSBTAG00000016963
ADD2	ENSBTAG00000009076
AGPAT4	ENSBTAG00000007668
AK7	ENSBTAG00000016854
ANKRD24	ENSBTAG00000014774
ANKRD33B	ENSBTAG00000011337
ARHGAP33	ENSBTAG00000009714
ARHGEF4	ENSBTAG00000015834
ARRDC5	ENSBTAG00000031673
AVIL	ENSBTAG00000016913
B3GAT1	ENSBTAG00000027477
B4GALNT4	ENSBTAG00000024814
BAALC	ENSBTAG00000026242
C10orf90	ENSBTAG00000011587
C11ORF16	ENSBTAG00000001917
C15orf52	ENSBTAG00000013774
C17orf67	ENSBTAG00000035147
C19orf57	ENSBTAG00000006064
C1orf167	ENSBTAG00000009386
C1QL1	ENSBTAG00000011759
C20orf96	ENSBTAG00000002115
C2orf73	ENSBTAG00000006861
C3orf67	ENSBTAG00000020373
C4orf17	ENSBTAG00000019429
CA12	ENSBTAG00000019390
CA4	ENSBTAG00000017969
CAGE1	ENSBTAG00000014587
CALB2	ENSBTAG00000001075
CASQ1	ENSBTAG00000020223
CCDC102B	ENSBTAG00000006726
CCDC114	ENSBTAG00000030667
CCDC166	ENSBTAG00000040360
CCDC171	ENSBTAG00000015788
CCDC85A	ENSBTAG00000012394
CCDC96	ENSBTAG00000047810
CCR8	ENSBTAG00000015483
CD164L2	ENSBTAG00000019728
CDH12	ENSBTAG00000025893
CDKL1	ENSBTAG00000004780
CHRNB2	ENSBTAG00000007517
CILP	ENSBTAG00000002821
CLEC5A	ENSBTAG00000020453
CNTN4	ENSBTAG00000033225
CRHBP	ENSBTAG00000020202
CSRP3	ENSBTAG00000011869
CTNND2	ENSBTAG00000017222
DCLK2	ENSBTAG00000008098
DLK2	ENSBTAG00000005850
DNAH9	ENSBTAG00000022509
DNAI2	ENSBTAG00000016732
DND1	ENSBTAG00000018845
DNER	ENSBTAG00000016063
DSG1	ENSBTAG00000013831
E2F7	ENSBTAG00000016931
ENPP6	ENSBTAG00000011573
ENSBTAG00000001432	ENSBTAG00000001432
ENSBTAG00000004640	ENSBTAG00000004640
ENSBTAG00000004921	ENSBTAG00000004921
ENSBTAG00000007724	ENSBTAG00000007724
ENSBTAG00000012192	ENSBTAG00000012192
ENSBTAG00000015309	ENSBTAG00000015309
ENSBTAG00000016166	ENSBTAG00000016166
ENSBTAG00000017227	ENSBTAG00000017227
ENSBTAG00000017946	ENSBTAG00000017946
ENSBTAG00000022395	ENSBTAG00000022395
ENSBTAG00000022528	ENSBTAG00000022528
ENSBTAG00000023939	ENSBTAG00000023939
ENSBTAG00000025021	ENSBTAG00000025021
ENSBTAG00000026068	ENSBTAG00000026068
ENSBTAG00000026383	ENSBTAG00000026383
ENSBTAG00000027419	ENSBTAG00000027419
ENSBTAG00000027727	ENSBTAG00000027727
ENSBTAG00000027770	ENSBTAG00000027770
ENSBTAG00000037421	ENSBTAG00000037421
ENSBTAG00000038438	ENSBTAG00000038438
ENSBTAG00000039038	ENSBTAG00000039038
ENSBTAG00000039132	ENSBTAG00000039132
ENSBTAG00000039674	ENSBTAG00000039674
ENSBTAG00000046193	ENSBTAG00000046193
ENSBTAG00000046200	ENSBTAG00000046200
ENSBTAG00000046392	ENSBTAG00000046392
ENSBTAG00000046975	ENSBTAG00000046975
ENSBTAG00000047302	ENSBTAG00000047302
ENSBTAG00000047374	ENSBTAG00000047374
ENSBTAG00000047398	ENSBTAG00000047398
ENSBTAG00000047642	ENSBTAG00000047642
ENSBTAG00000047675	ENSBTAG00000047675
ENSBTAG00000047725	ENSBTAG00000047725
EXOC3L1	ENSBTAG00000012035
F11	ENSBTAG00000003572
F12	ENSBTAG00000018872
FAM183A	ENSBTAG00000037555
FAM212B	ENSBTAG00000022580
FAM78B	ENSBTAG00000047468
FAR2	ENSBTAG00000011095
FBXO10	ENSBTAG00000012262
FBXO40	ENSBTAG00000014508
FCRL3	ENSBTAG00000039702
FNDC4	ENSBTAG00000018164
FRZB	ENSBTAG00000010977
GABBR2	ENSBTAG00000013810
GABRG1	ENSBTAG00000012296
GLIS1	ENSBTAG00000017986
GPR182	ENSBTAG00000039157
GPR37	ENSBTAG00000013732
GREB1L	ENSBTAG00000008275
GSDMA	ENSBTAG00000010070
HSD17B14	ENSBTAG00000009174
HSPA4L	ENSBTAG00000015692
IL17RE	ENSBTAG00000010833
IL23R	ENSBTAG00000014983
ILDR2	ENSBTAG00000019497
JAKMIP1	ENSBTAG00000011170
KCNRG	ENSBTAG00000008176
KCNT1	ENSBTAG00000018975
KIAA1549	ENSBTAG00000021073
KIF7	ENSBTAG00000002440
KLF1	ENSBTAG00000006083
KLHL29	ENSBTAG00000021969
KLHL3	ENSBTAG00000002796
KLHL35	ENSBTAG00000015087
KLRF1	ENSBTAG00000037534
LCA5	ENSBTAG00000043950
LMX1B	ENSBTAG00000010228
LRRC3	ENSBTAG00000017882
LY6K	ENSBTAG00000000158
LZTS1	ENSBTAG00000000841
MAMSTR	ENSBTAG00000011617
MAP6D1	ENSBTAG00000014459
MCF2L2	ENSBTAG00000010394
MEOX1	ENSBTAG00000015751
MFAP5	ENSBTAG00000000310
MGARP	ENSBTAG00000002599
MORN1	ENSBTAG00000009306
MSH5	ENSBTAG00000019790
MYCBPAP	ENSBTAG00000014355
MYH13	ENSBTAG00000025337
MYLK3	ENSBTAG00000014818
MYOM3	ENSBTAG00000014885
NAT8	ENSBTAG00000047969
NECAB2	ENSBTAG00000020236
NECAB3	ENSBTAG00000003946
NELL2	ENSBTAG00000032183
NEURL3	ENSBTAG00000002965
NIM1K	ENSBTAG00000006233
NKAPL	ENSBTAG00000031871
NLGN1	ENSBTAG00000031891
NOVA1	ENSBTAG00000002170
NOX4	ENSBTAG00000018540
NPHP4	ENSBTAG00000008126
NRXN2	ENSBTAG00000000244
NTNG2	ENSBTAG00000007235
NWD1	ENSBTAG00000009328
NXPH4	ENSBTAG00000047650
NYAP2	ENSBTAG00000019152
PACSIN1	ENSBTAG00000016124
PCDH15	ENSBTAG00000045905
PCDH17	ENSBTAG00000010420
PCDHB15	ENSBTAG00000039067
PCDHB16	ENSBTAG00000015453
PCDHB4	ENSBTAG00000045603
PCDHGB1	ENSBTAG00000046103
PCDHGB2	ENSBTAG00000037968
PCLO	ENSBTAG00000017350
PCSK2	ENSBTAG00000008687
PHOSPHO1	ENSBTAG00000000033
PI16	ENSBTAG00000002092
PLA1A	ENSBTAG00000009392
PLAC8L1	ENSBTAG00000044067
PLCXD2	ENSBTAG00000012646
PLEKHS1	ENSBTAG00000011487
PODNL1	ENSBTAG00000006073
POPDC3	ENSBTAG00000046017
PPP1R9A	ENSBTAG00000024426
PPP4R4	ENSBTAG00000009891
PRICKLE2	ENSBTAG00000021835
PRRT1	ENSBTAG00000038904
PTPN5	ENSBTAG00000020257
RASD2	ENSBTAG00000017116
REEP2	ENSBTAG00000010068
RGMA	ENSBTAG00000018603
RGS9	ENSBTAG00000017751
RHPN1	ENSBTAG00000002104
RIMKLB	ENSBTAG00000003291
RPRM	ENSBTAG00000021526
RRAD	ENSBTAG00000013929
RSPH1	ENSBTAG00000021284
RSPO1	ENSBTAG00000003837
SCN3B	ENSBTAG00000016768
SCN4B	ENSBTAG00000039340
SCRN1	ENSBTAG00000016223
SCUBE3	ENSBTAG00000009226
SDR9C7	ENSBTAG00000013443
SERPINE3	ENSBTAG00000005284
SHC3	ENSBTAG00000011375
SLBP2	ENSBTAG00000048053
SLC10A1	ENSBTAG00000001881
SLC16A9	ENSBTAG00000019792
SLC39A2	ENSBTAG00000000936
SLC4A11	ENSBTAG00000027409
SLC4A3	ENSBTAG00000014975
SLC6A15	ENSBTAG00000018432
SLITRK5	ENSBTAG00000010129
SPESP1	ENSBTAG00000005994
SRGAP3	ENSBTAG00000004685
ST6GALNAC1	ENSBTAG00000001998
ST8SIA1	ENSBTAG00000000593
STOX1	ENSBTAG00000019028
SYNGAP1	ENSBTAG00000020975
TAL1	ENSBTAG00000005029
TAL2	ENSBTAG00000045852
TANC2	ENSBTAG00000004249
TARM1	ENSBTAG00000045861
TARSL2	ENSBTAG00000007651
TBKBP1	ENSBTAG00000011280
TERT	ENSBTAG00000012567
TGM3	ENSBTAG00000001785
THBS2	ENSBTAG00000018810
THSD7A	ENSBTAG00000007680
TIGD7	ENSBTAG00000020209
TLR10	ENSBTAG00000014042
TMEM182	ENSBTAG00000038462
TMEM198	ENSBTAG00000020540
TMEM74	ENSBTAG00000039141
TMOD2	ENSBTAG00000014011
TNFSF18	ENSBTAG00000047412
TP73	ENSBTAG00000005812
TRIM10	ENSBTAG00000007530
TSHZ2	ENSBTAG00000007917
TSPO2	ENSBTAG00000010197
TTC21A	ENSBTAG00000010477
TTC23L	ENSBTAG00000032933
UCP3	ENSBTAG00000005259
UGGT2	ENSBTAG00000004401
UPK3B	ENSBTAG00000021430
UPP1	ENSBTAG00000008428
WBSCR17	ENSBTAG00000008718
WISP1	ENSBTAG00000000707
WNT8A	ENSBTAG00000005570
XRRA1	ENSBTAG00000006610
XYLT1	ENSBTAG00000005523
YBX2	ENSBTAG00000009126
ZBTB32	ENSBTAG00000023611
ZNF214	ENSBTAG00000020289
ZNF516	ENSBTAG00000004650
ZNF554	ENSBTAG00000031352
ZNF683	ENSBTAG00000009631
ACKR4	ENSBTAG00000019577
ENSBTAG00000017641	ENSBTAG00000017641
ENSBTAG00000033531	ENSBTAG00000033531
ENSBTAG00000046461	ENSBTAG00000046461
ENSBTAG00000046720	ENSBTAG00000046720
ENSBTAG00000047174	ENSBTAG00000047174
ENSBTAG00000047570	ENSBTAG00000047570
LRRC4	ENSBTAG00000010704
PHKG1	ENSBTAG00000008195
PKDREJ	ENSBTAG00000008066
PTX3	ENSBTAG00000009012
SPACA4	ENSBTAG00000048127
ZNF750	ENSBTAG00000015406
ACER1	ENSBTAG00000008095
ACTN3	ENSBTAG00000022244
ADAMTS17	ENSBTAG00000019823
ADAMTS5	ENSBTAG00000000648
ADCY1	ENSBTAG00000009520
ALX3	ENSBTAG00000020966
AMPH	ENSBTAG00000031967
ANXA9	ENSBTAG00000015304
APBA1	ENSBTAG00000008877
APOBEC2	ENSBTAG00000005974
ARHGAP20	ENSBTAG00000000333
ARHGDIG	ENSBTAG00000027854
ART4	ENSBTAG00000008352
ARVCF	ENSBTAG00000001473
ASB5	ENSBTAG00000014143
ASGR1	ENSBTAG00000012071
ATP6V1B1	ENSBTAG00000010620
ATP6V1E2	ENSBTAG00000013734
C10orf71	ENSBTAG00000047155
C9orf50	ENSBTAG00000019513
CASR	ENSBTAG00000003865
CBX2	ENSBTAG00000038306
CCDC150	ENSBTAG00000017695
CCDC153	ENSBTAG00000017794
CCDC157	ENSBTAG00000003393
CCER2	ENSBTAG00000046295
CD300LB	ENSBTAG00000008327
CDKL4	ENSBTAG00000024044
CEMIP	ENSBTAG00000007431
CERKL	ENSBTAG00000009257
CHRDL2	ENSBTAG00000021306
CIART	ENSBTAG00000021487
CILP2	ENSBTAG00000014969
CNR2	ENSBTAG00000019371
CNTLN	ENSBTAG00000001847
CNTNAP4	ENSBTAG00000026004
COCH	ENSBTAG00000021844
COL17A1	ENSBTAG00000002430
CSPG5	ENSBTAG00000002309
DBF4B	ENSBTAG00000005696
DLL3	ENSBTAG00000010483
DLX4	ENSBTAG00000007353
DMXL2	ENSBTAG00000000737
DTNA	ENSBTAG00000012307
DYNC1I1	ENSBTAG00000027134
ELF5	ENSBTAG00000012460
ENKUR	ENSBTAG00000015569
ENSBTAG00000003200	ENSBTAG00000003200
ENSBTAG00000003810	ENSBTAG00000003810
ENSBTAG00000004354	ENSBTAG00000004354
ENSBTAG00000005908	ENSBTAG00000005908
ENSBTAG00000006859	ENSBTAG00000006859
ENSBTAG00000010270	ENSBTAG00000010270
ENSBTAG00000011470	ENSBTAG00000011470
ENSBTAG00000017012	ENSBTAG00000017012
ENSBTAG00000017955	ENSBTAG00000017955
ENSBTAG00000018009	ENSBTAG00000018009
ENSBTAG00000019076	ENSBTAG00000019076
ENSBTAG00000021501	ENSBTAG00000021501
ENSBTAG00000024318	ENSBTAG00000024318
ENSBTAG00000026249	ENSBTAG00000026249
ENSBTAG00000026882	ENSBTAG00000026882
ENSBTAG00000030792	ENSBTAG00000030792
ENSBTAG00000030882	ENSBTAG00000030882
ENSBTAG00000033021	ENSBTAG00000033021
ENSBTAG00000038565	ENSBTAG00000038565
ENSBTAG00000038903	ENSBTAG00000038903
ENSBTAG00000039789	ENSBTAG00000039789
ENSBTAG00000045630	ENSBTAG00000045630
ENSBTAG00000045743	ENSBTAG00000045743
ENSBTAG00000045912	ENSBTAG00000045912
ENSBTAG00000046265	ENSBTAG00000046265
ENSBTAG00000047538	ENSBTAG00000047538
ENSBTAG00000047587	ENSBTAG00000047587
EOMES	ENSBTAG00000016920
EPHA6	ENSBTAG00000044111
EVC2	ENSBTAG00000004277
F13A1	ENSBTAG00000007268
FAM13C	ENSBTAG00000017540
FAM184A	ENSBTAG00000015467
FAM217B	ENSBTAG00000045509
FBXO36	ENSBTAG00000010338
FGF18	ENSBTAG00000000128
FSD1	ENSBTAG00000005999
FXYD7	ENSBTAG00000018326
GAL3ST2	ENSBTAG00000009093
GAP43	ENSBTAG00000006451
GCK	ENSBTAG00000032288
GDF15	ENSBTAG00000015618
GHRH	ENSBTAG00000012710
GJB3	ENSBTAG00000012584
GLB1L3	ENSBTAG00000038756
GPR33	ENSBTAG00000010536
GPR68	ENSBTAG00000006738
GPR84	ENSBTAG00000015592
GRIK4	ENSBTAG00000017146
HCRTR1	ENSBTAG00000010366
HGF	ENSBTAG00000017664
HOXB2	ENSBTAG00000009979
HRG	ENSBTAG00000001265
HSD11B1	ENSBTAG00000015086
HSF4	ENSBTAG00000003514
HTR7	ENSBTAG00000008783
IDO2	ENSBTAG00000005725
INTU	ENSBTAG00000012824
ITGA2B	ENSBTAG00000008165
ITGA7	ENSBTAG00000012897
JPH2	ENSBTAG00000023002
JPH4	ENSBTAG00000007104
KCNG3	ENSBTAG00000032623
KCNK2	ENSBTAG00000004407
KCNQ5	ENSBTAG00000007791
KL	ENSBTAG00000013984
KLHDC1	ENSBTAG00000031697
KLHDC8A	ENSBTAG00000015197
KRT23	ENSBTAG00000040460
LAYN	ENSBTAG00000017901
LHFPL4	ENSBTAG00000010916
LIF	ENSBTAG00000007424
LMX1A	ENSBTAG00000012025
LOXL3	ENSBTAG00000018578
LRRC31	ENSBTAG00000010679
LSMEM1	ENSBTAG00000010555
MANEAL	ENSBTAG00000046989
MAP3K9	ENSBTAG00000005700
MCOLN3	ENSBTAG00000016982
MED12L	ENSBTAG00000021703
MEGF10	ENSBTAG00000000329
MGC134087	ENSBTAG00000004951
MNS1	ENSBTAG00000000271
MYL1	ENSBTAG00000009707
NCKAP5	ENSBTAG00000005238
NETO2	ENSBTAG00000014370
NINJ2	ENSBTAG00000008554
NOD1	ENSBTAG00000038235
NUAK1	ENSBTAG00000010457
OASL	ENSBTAG00000003297
OLFM2	ENSBTAG00000007550
OLFML2B	ENSBTAG00000034147
OR11H7	ENSBTAG00000032801
OTOP2	ENSBTAG00000021257
PALM2	ENSBTAG00000046602
PDE1B	ENSBTAG00000004337
PDE6A	ENSBTAG00000012945
PERM1	ENSBTAG00000014540
PGBD1	ENSBTAG00000046573
PHKG1	ENSBTAG00000008195
PIK3R6	ENSBTAG00000016344
PKHD1	ENSBTAG00000011237
PKP1	ENSBTAG00000046350
PLCD3	ENSBTAG00000006052
PLCL1	ENSBTAG00000007635
POU6F1	ENSBTAG00000016362
PPIL6	ENSBTAG00000008144
PPP2R2B	ENSBTAG00000001862
PRIMA1	ENSBTAG00000015880
PRPH	ENSBTAG00000017864
PRR30	ENSBTAG00000047596
PRSS12	ENSBTAG00000020705
PTPRO	ENSBTAG00000006256
RAB6B	ENSBTAG00000000905
RANBP17	ENSBTAG00000024801
RIN1	ENSBTAG00000017681
RUNDC3A	ENSBTAG00000001615
RXFP4	ENSBTAG00000046885
RXRG	ENSBTAG00000016801
SACS	ENSBTAG00000001867
SGTB	ENSBTAG00000016902
SH2D7	ENSBTAG00000047166
SH3RF3	ENSBTAG00000038011
SLC2A12	ENSBTAG00000019002
SLIT2	ENSBTAG00000005108
SLITRK3	ENSBTAG00000017180
SOX10	ENSBTAG00000004822
SPATA6L	ENSBTAG00000011048
SPATA9	ENSBTAG00000007231
SSC5D	ENSBTAG00000030885
ST18	ENSBTAG00000005560
STAC3	ENSBTAG00000018358
STK31	ENSBTAG00000010609
STK32A	ENSBTAG00000000626
STMND1	ENSBTAG00000020559
STRA6	ENSBTAG00000007348
SULT6B1	ENSBTAG00000008707
TACR2	ENSBTAG00000021664
TENM3	ENSBTAG00000021133
TF	ENSBTAG00000007273
TGFB3	ENSBTAG00000012004
TLCD2	ENSBTAG00000011490
TMEM132B	ENSBTAG00000006626
TMEM215	ENSBTAG00000013974
TMEM38A	ENSBTAG00000013614
TMSB4X	ENSBTAG00000031795
TNFRSF9	ENSBTAG00000003313
TNFSF9	ENSBTAG00000046266
TNNT3	ENSBTAG00000022158
TP53TG5	ENSBTAG00000005184
TRIM9	ENSBTAG00000010103
TSPAN32	ENSBTAG00000002702
TSSK3	ENSBTAG00000020652
TTLL7	ENSBTAG00000003322
VWA3B	ENSBTAG00000034384
WISP3	ENSBTAG00000017205
WTIP	ENSBTAG00000007841
XKR9	ENSBTAG00000048138
ZNF423	ENSBTAG00000017397
ZNF438	ENSBTAG00000016294
ZNF684	ENSBTAG00000000533
ZSWIM1	ENSBTAG00000000959
ENSBTAG00000023970	ENSBTAG00000023970
ENSBTAG00000034090	ENSBTAG00000034090
ENSBTAG00000039402	ENSBTAG00000039402
ENSBTAG00000044492	ENSBTAG00000044492
ENSBTAG00000047080	ENSBTAG00000047080
OMG	ENSBTAG00000025213
SFMBT2	ENSBTAG00000005915
SOGA1	ENSBTAG00000021669
ABCA7	ENSBTAG00000020766
ABCA9	ENSBTAG00000006896
ACSM5	ENSBTAG00000037449
ACTL6B	ENSBTAG00000008295
ADAMTS4	ENSBTAG00000013210
ADAMTS7	ENSBTAG00000001396
ADAMTS9	ENSBTAG00000003165
ADCY4	ENSBTAG00000018419
AIFM3	ENSBTAG00000038132
ANKRD37	ENSBTAG00000018453
ARHGAP28	ENSBTAG00000019036
ASZ1	ENSBTAG00000000169
ATP6V0A4	ENSBTAG00000004263
ATRNL1	ENSBTAG00000017709
BACH2	ENSBTAG00000020713
BTBD11	ENSBTAG00000027064
C14orf79	ENSBTAG00000010370
C5orf52	ENSBTAG00000017438
CACNA1A	ENSBTAG00000014828
CACNA1C	ENSBTAG00000010660
CALN1	ENSBTAG00000043969
CAMKK1	ENSBTAG00000007166
CAP2	ENSBTAG00000016924
CASS4	ENSBTAG00000014555
CCDC151	ENSBTAG00000008201
CCDC18	ENSBTAG00000027321
CD248	ENSBTAG00000044073
CD300E	ENSBTAG00000004690
CDKN2A	ENSBTAG00000034220
CES1	ENSBTAG00000011021
CHN1	ENSBTAG00000008028
CHST1	ENSBTAG00000003721
CIB3	ENSBTAG00000016179
CLEC11A	ENSBTAG00000005576
CNTFR	ENSBTAG00000015361
CNTNAP1	ENSBTAG00000019097
COL28A1	ENSBTAG00000024420
COL5A3	ENSBTAG00000010179
COL7A1	ENSBTAG00000019081
CPNE5	ENSBTAG00000007514
CRLF2	ENSBTAG00000020242
ENSBTAG00000001879	ENSBTAG00000001879
ENSBTAG00000003754	ENSBTAG00000003754
ENSBTAG00000014329	ENSBTAG00000014329
ENSBTAG00000019309	ENSBTAG00000019309
ENSBTAG00000020802	ENSBTAG00000020802
ENSBTAG00000027534	ENSBTAG00000027534
ENSBTAG00000032373	ENSBTAG00000032373
ENSBTAG00000033036	ENSBTAG00000033036
ENSBTAG00000034091	ENSBTAG00000034091
ENSBTAG00000037924	ENSBTAG00000037924
ENSBTAG00000038770	ENSBTAG00000038770
ENSBTAG00000038916	ENSBTAG00000038916
ENSBTAG00000039971	ENSBTAG00000039971
ENSBTAG00000046733	ENSBTAG00000046733
ENSBTAG00000046828	ENSBTAG00000046828
ENSBTAG00000047001	ENSBTAG00000047001
ENSBTAG00000047084	ENSBTAG00000047084
ENSBTAG00000047522	ENSBTAG00000047522
ENSBTAG00000047690	ENSBTAG00000047690
ENSBTAG00000048012	ENSBTAG00000048012
ERP27	ENSBTAG00000006036
EVC	ENSBTAG00000004287
EXTL1	ENSBTAG00000006349
FAM129C	ENSBTAG00000018946
FAM20A	ENSBTAG00000001085
FBN2	ENSBTAG00000015307
FCRL5	ENSBTAG00000000964
FOXP2	ENSBTAG00000011246
FSD2	ENSBTAG00000015018
G0S2	ENSBTAG00000047766
GAL	ENSBTAG00000009393
GALNT15	ENSBTAG00000008240
GLIS2	ENSBTAG00000009199
GPR176	ENSBTAG00000016826
GPR19	ENSBTAG00000011959
GPRIN2	ENSBTAG00000046597
GZMK	ENSBTAG00000005164
HAL	ENSBTAG00000016276
HDC	ENSBTAG00000009911
HEATR4	ENSBTAG00000002842
HMCN2	ENSBTAG00000002319
HRH4	ENSBTAG00000020467
HTR1D	ENSBTAG00000040329
IGDCC4	ENSBTAG00000006440
IL10	ENSBTAG00000006685
IL1R2	ENSBTAG00000006343
INCA1	ENSBTAG00000008593
INSC	ENSBTAG00000032782
ITGA8	ENSBTAG00000007602
IZUMO1	ENSBTAG00000011621
KIF26B	ENSBTAG00000012715
KRT9	ENSBTAG00000047165
L3HYPDH	ENSBTAG00000030824
LIN7A	ENSBTAG00000011367
LRRC27	ENSBTAG00000003800
LRRC49	ENSBTAG00000010944
LRRC6	ENSBTAG00000010548
LTBP2	ENSBTAG00000021957
MAP1LC3C	ENSBTAG00000012462
MAPK12	ENSBTAG00000019574
MAPK8IP1	ENSBTAG00000000317
MAPK8IP2	ENSBTAG00000030179
MDH1B	ENSBTAG00000016192
MEDAG	ENSBTAG00000008271
MGAM	ENSBTAG00000046152
MOV10L1	ENSBTAG00000020341
MYH1	ENSBTAG00000018204
NCMAP	ENSBTAG00000012604
NEURL2	ENSBTAG00000000961
NKD1	ENSBTAG00000012295
NSUN7	ENSBTAG00000001572
NUDT6	ENSBTAG00000005695
NXPH2	ENSBTAG00000018147
OSCAR	ENSBTAG00000001051
OSR1	ENSBTAG00000008113
P2RY11	ENSBTAG00000013536
PARD6G	ENSBTAG00000005917
PCBP3	ENSBTAG00000030775
PCDHA13	ENSBTAG00000030227
PCDHGA7	ENSBTAG00000037717
PCED1B	ENSBTAG00000011838
PP2D1	ENSBTAG00000004061
PPEF2	ENSBTAG00000015449
PPP1R3A	ENSBTAG00000006733
PPP2R2C	ENSBTAG00000020598
PTP4A3	ENSBTAG00000046467
PTPRU	ENSBTAG00000012848
RAPGEF4	ENSBTAG00000020984
RAPSN	ENSBTAG00000021745
RASD1	ENSBTAG00000020520
RASGRF2	ENSBTAG00000030259
RASL12	ENSBTAG00000000062
RASSF9	ENSBTAG00000026966
RELT	ENSBTAG00000016494
RGS6	ENSBTAG00000014189
RTKN2	ENSBTAG00000014020
S100A9	ENSBTAG00000006505
SCARF2	ENSBTAG00000019375
SDK2	ENSBTAG00000044195
SEMA3D	ENSBTAG00000024394
SEMA6C	ENSBTAG00000007281
SFMBT2	ENSBTAG00000005915
SGCD	ENSBTAG00000044046
SLC12A3	ENSBTAG00000006630
SLC2A6	ENSBTAG00000001824
SLC35F1	ENSBTAG00000033657
SLC47A1	ENSBTAG00000016544
SNED1	ENSBTAG00000014132
SNX32	ENSBTAG00000021454
SOX5	ENSBTAG00000022360
SPRED3	ENSBTAG00000017678
STAC	ENSBTAG00000006735
STXBP5L	ENSBTAG00000001918
SVOP	ENSBTAG00000018833
SYT9	ENSBTAG00000032079
TBX21	ENSBTAG00000014199
TCF7L1	ENSBTAG00000010111
TFAP2E	ENSBTAG00000001959
THEMIS	ENSBTAG00000015615
TLL1	ENSBTAG00000005968
TNNI2	ENSBTAG00000010880
TRAIP	ENSBTAG00000004877
TRPC1	ENSBTAG00000002232
TRPV5	ENSBTAG00000001912
UCN3	ENSBTAG00000035696
USP13	ENSBTAG00000005946
VSTM2L	ENSBTAG00000004750
WDR31	ENSBTAG00000005884
ZBTB3	ENSBTAG00000021329
ZBTB37	ENSBTAG00000004361
ZFP42	ENSBTAG00000044139
ZKSCAN4	ENSBTAG00000003575
ZNF521	ENSBTAG00000007383
ZNF70	ENSBTAG00000047718
ZSWIM4	ENSBTAG00000002527
bta-mir-1307	ENSBTAG00000038879
ENSBTAG00000014662	ENSBTAG00000014662
ENSBTAG00000038176	ENSBTAG00000038176
ENSBTAG00000047323	ENSBTAG00000047323
GNG3	ENSBTAG00000002508
HOXA4	ENSBTAG00000001063
SNORA62	ENSBTAG00000043214
VASN	ENSBTAG00000046339
ADARB1	ENSBTAG00000017486
ADRB1	ENSBTAG00000001242
AFAP1L1	ENSBTAG00000019948
AMHR2	ENSBTAG00000018524
AMPD3	ENSBTAG00000015821
ANKRD45	ENSBTAG00000044117
ARMC12	ENSBTAG00000010877
ARMC2	ENSBTAG00000036087
ASGR2	ENSBTAG00000025101
ASXL3	ENSBTAG00000047003
BDKRB1	ENSBTAG00000007052
BNIPL	ENSBTAG00000015345
C21orf62	ENSBTAG00000043993
C9orf43	ENSBTAG00000009596
CABP2	ENSBTAG00000022209
CCDC181	ENSBTAG00000020264
CCT6B	ENSBTAG00000020338
CDH2	ENSBTAG00000021190
CDH3	ENSBTAG00000033248
CDKL2	ENSBTAG00000014038
CHRNE	ENSBTAG00000004908
CLGN	ENSBTAG00000001580
CLNK	ENSBTAG00000038340
COL13A1	ENSBTAG00000011741
COL27A1	ENSBTAG00000019807
CROCC	ENSBTAG00000003822
CRYBA2	ENSBTAG00000014819
CTTNBP2	ENSBTAG00000021469
DHRS9	ENSBTAG00000004557
DNAH7	ENSBTAG00000016784
DNAJC27	ENSBTAG00000018239
EIF5A2	ENSBTAG00000010550
ENDOU	ENSBTAG00000012275
ENO2	ENSBTAG00000011274
ENO4	ENSBTAG00000004330
ENSBTAG00000000812	ENSBTAG00000000812
ENSBTAG00000000966	ENSBTAG00000000966
ENSBTAG00000002605	ENSBTAG00000002605
ENSBTAG00000003676	ENSBTAG00000003676
ENSBTAG00000003957	ENSBTAG00000003957
ENSBTAG00000004608	ENSBTAG00000004608
ENSBTAG00000011195	ENSBTAG00000011195
ENSBTAG00000014220	ENSBTAG00000014220
ENSBTAG00000017477	ENSBTAG00000017477
ENSBTAG00000019348	ENSBTAG00000019348
ENSBTAG00000020151	ENSBTAG00000020151
ENSBTAG00000030426	ENSBTAG00000030426
ENSBTAG00000031354	ENSBTAG00000031354
ENSBTAG00000032350	ENSBTAG00000032350
ENSBTAG00000034138	ENSBTAG00000034138
ENSBTAG00000037490	ENSBTAG00000037490
ENSBTAG00000037906	ENSBTAG00000037906
ENSBTAG00000040144	ENSBTAG00000040144
ENSBTAG00000040437	ENSBTAG00000040437
ENSBTAG00000045880	ENSBTAG00000045880
ENSBTAG00000045892	ENSBTAG00000045892
ENSBTAG00000046268	ENSBTAG00000046268
ENSBTAG00000046372	ENSBTAG00000046372
ENSBTAG00000046967	ENSBTAG00000046967
ENSBTAG00000048040	ENSBTAG00000048040
FAM109B	ENSBTAG00000009507
FAM110D	ENSBTAG00000013131
FAM167A	ENSBTAG00000019066
FAM198B	ENSBTAG00000017069
FAM71E1	ENSBTAG00000020082
FRMD1	ENSBTAG00000014062
FZD9	ENSBTAG00000020742
GAL3ST4	ENSBTAG00000015017
GDAP1	ENSBTAG00000012608
GLI3	ENSBTAG00000010671
GNA14	ENSBTAG00000021127
GNG3	ENSBTAG00000002508
GPR161	ENSBTAG00000000616
GRB14	ENSBTAG00000019291
GUCY2D	ENSBTAG00000008773
HECW2	ENSBTAG00000020696
HEYL	ENSBTAG00000008688
HPD	ENSBTAG00000004175
HSD17B13	ENSBTAG00000031679
HSD17B6	ENSBTAG00000011720
HUNK	ENSBTAG00000020762
IKZF2	ENSBTAG00000037804
IL20RB	ENSBTAG00000008299
IMPG2	ENSBTAG00000015662
INPP5E	ENSBTAG00000001354
ITGA10	ENSBTAG00000008373
JPH1	ENSBTAG00000008842
KCNC1	ENSBTAG00000005424
KCNK7	ENSBTAG00000010802
KCTD7	ENSBTAG00000017435
KERA	ENSBTAG00000014340
KIAA1456	ENSBTAG00000008950
KLHDC7A	ENSBTAG00000030322
LBP	ENSBTAG00000016864
LONRF2	ENSBTAG00000004327
M1AP	ENSBTAG00000006988
MOK	ENSBTAG00000007008
MS4A14	ENSBTAG00000004581
MS4A2	ENSBTAG00000020096
NAV3	ENSBTAG00000009852
NGFR	ENSBTAG00000020979
NKX2-2	ENSBTAG00000010277
NMUR1	ENSBTAG00000017684
NOS3	ENSBTAG00000017680
NR4A3	ENSBTAG00000001864
OSGIN1	ENSBTAG00000012508
PAQR7	ENSBTAG00000021787
PASK	ENSBTAG00000000785
PAX5	ENSBTAG00000012498
PBX4	ENSBTAG00000009975
PCDH12	ENSBTAG00000008437
PDE6G	ENSBTAG00000000354
PDZD9	ENSBTAG00000021652
PKNOX2	ENSBTAG00000000052
PON1	ENSBTAG00000015654
PPFIA4	ENSBTAG00000015885
RAB3C	ENSBTAG00000007306
RCAN2	ENSBTAG00000009302
RUSC2	ENSBTAG00000011403
S100A12	ENSBTAG00000012638
SAC3D1	ENSBTAG00000002248
SCN5A	ENSBTAG00000009155
SEC14L4	ENSBTAG00000031351
SHE	ENSBTAG00000020542
SLC1A3	ENSBTAG00000018245
SLC26A3	ENSBTAG00000015547
SLURP1	ENSBTAG00000016209
SNORA62	ENSBTAG00000043214
SPAG1	ENSBTAG00000032544
SPNS3	ENSBTAG00000016175
STK32C	ENSBTAG00000011562
STX1A	ENSBTAG00000017075
SV2B	ENSBTAG00000027074
SVEP1	ENSBTAG00000020243
SYNC	ENSBTAG00000026684
TEKT3	ENSBTAG00000003802
THAP8	ENSBTAG00000014995
TMEM177	ENSBTAG00000009058
TPD52L1	ENSBTAG00000003336
TRIM17	ENSBTAG00000018673
TRPC4	ENSBTAG00000009405
TRPV4	ENSBTAG00000000031
TSGA10	ENSBTAG00000018991
VAMP1	ENSBTAG00000014603
VEPH1	ENSBTAG00000024643
VPS37D	ENSBTAG00000008487
VWA5B2	ENSBTAG00000040399
WNT11	ENSBTAG00000010820
ZBTB46	ENSBTAG00000016667
ZC3H6	ENSBTAG00000020646
ZFHX2	ENSBTAG00000007053
ZMYND12	ENSBTAG00000012979
ZNF135	ENSBTAG00000003462
ZNF398	ENSBTAG00000020445
ZNF713	ENSBTAG00000008175
ZNF879	ENSBTAG00000038541
ZNRF3	ENSBTAG00000022036
DNAI1	ENSBTAG00000008538
ENSBTAG00000034503	ENSBTAG00000034503
ENSBTAG00000045917	ENSBTAG00000045917
GPR146	ENSBTAG00000046014
SAMD13	ENSBTAG00000048203
SCARNA14	ENSBTAG00000044425
SNORA48	ENSBTAG00000042836
SNORA49	ENSBTAG00000043329
SYCE1L	ENSBTAG00000023780
ABCG1	ENSBTAG00000021272
ALPK1	ENSBTAG00000034875
AMDHD1	ENSBTAG00000016275
ANKRD23	ENSBTAG00000010849
APLNR	ENSBTAG00000027516
ARHGAP44	ENSBTAG00000021938
ARHGEF10	ENSBTAG00000008585
ARHGEF10L	ENSBTAG00000000684
ARHGEF15	ENSBTAG00000020688
ARL4D	ENSBTAG00000016847
ARL5C	ENSBTAG00000002035
BAHCC1	ENSBTAG00000016776
BBS10	ENSBTAG00000004425
BHLHE41	ENSBTAG00000030575
CADPS	ENSBTAG00000005321
CBLN1	ENSBTAG00000015194
CCBE1	ENSBTAG00000008723
CCDC17	ENSBTAG00000008808
CCDC175	ENSBTAG00000011448
CCDC38	ENSBTAG00000016274
CD109	ENSBTAG00000013222
CERCAM	ENSBTAG00000038139
CHD5	ENSBTAG00000040477
CHODL	ENSBTAG00000000588
CORO2B	ENSBTAG00000012681
CYB5R2	ENSBTAG00000016142
DCUN1D2	ENSBTAG00000018671
DKK2	ENSBTAG00000012969
DMRTA1	ENSBTAG00000001315
DMTN	ENSBTAG00000045887
DNAI1	ENSBTAG00000008538
DRAXIN	ENSBTAG00000014359
DZIP3	ENSBTAG00000006158
EBF4	ENSBTAG00000037757
EFCC1	ENSBTAG00000005922
ENSBTAG00000000336	ENSBTAG00000000336
ENSBTAG00000018312	ENSBTAG00000018312
ENSBTAG00000024178	ENSBTAG00000024178
ENSBTAG00000026796	ENSBTAG00000026796
ENSBTAG00000031234	ENSBTAG00000031234
ENSBTAG00000031355	ENSBTAG00000031355
ENSBTAG00000045854	ENSBTAG00000045854
ENSBTAG00000046121	ENSBTAG00000046121
ENSBTAG00000046270	ENSBTAG00000046270
ENSBTAG00000047260	ENSBTAG00000047260
ENSBTAG00000047722	ENSBTAG00000047722
ENSBTAG00000047729	ENSBTAG00000047729
EPM2A	ENSBTAG00000015181
EXD3	ENSBTAG00000023788
EXOC3L2	ENSBTAG00000015836
FAM111A	ENSBTAG00000002450
FAM180A	ENSBTAG00000017427
FAM69C	ENSBTAG00000000106
FAT4	ENSBTAG00000003345
FBXO16	ENSBTAG00000034626
FGD5	ENSBTAG00000006789
FGFBP1	ENSBTAG00000031497
FMO3	ENSBTAG00000020597
GDNF	ENSBTAG00000005176
GFRA2	ENSBTAG00000020665
GJB2	ENSBTAG00000017425
GLT8D2	ENSBTAG00000000925
GNAL	ENSBTAG00000002125
GNGT2	ENSBTAG00000047325
HSPA6	ENSBTAG00000039035
IGFALS	ENSBTAG00000033299
IL12RB1	ENSBTAG00000011481
IL4I1	ENSBTAG00000005766
IQCD	ENSBTAG00000001806
IQCK	ENSBTAG00000044092
KCNH6	ENSBTAG00000016613
KIAA0408	ENSBTAG00000003919
KIRREL	ENSBTAG00000005799
LETM2	ENSBTAG00000015444
LGR5	ENSBTAG00000013256
LIPC	ENSBTAG00000005479
LTB4R	ENSBTAG00000010238
LYNX1	ENSBTAG00000005762
MAMDC2	ENSBTAG00000017369
MAP3K8	ENSBTAG00000011600
MAPK15	ENSBTAG00000019864
MCC	ENSBTAG00000035858
ME1	ENSBTAG00000005681
MEIS3	ENSBTAG00000006862
MFAP3L	ENSBTAG00000019539
MYCT1	ENSBTAG00000043975
MYOCD	ENSBTAG00000035706
NCKAP5L	ENSBTAG00000004851
NEDD4	ENSBTAG00000013793
NFATC4	ENSBTAG00000006366
NGEF	ENSBTAG00000008942
NMU	ENSBTAG00000044161
P2RY2	ENSBTAG00000039050
PAQR5	ENSBTAG00000020352
PARK2	ENSBTAG00000018996
PELI2	ENSBTAG00000005141
PIEZO2	ENSBTAG00000011171
PITPNM3	ENSBTAG00000002982
POLQ	ENSBTAG00000001920
RAB15	ENSBTAG00000003474
RAB3B	ENSBTAG00000005337
RBBP8NL	ENSBTAG00000003163
REEP1	ENSBTAG00000004824
RILP	ENSBTAG00000038889
RUNX1T1	ENSBTAG00000017339
SAMD13	ENSBTAG00000048203
SAMD4A	ENSBTAG00000001468
SBSPON	ENSBTAG00000017249
SCARNA13	ENSBTAG00000044659
SFI1	ENSBTAG00000008996
SGSM1	ENSBTAG00000006592
SHANK2	ENSBTAG00000003171
SLC13A3	ENSBTAG00000000873
SLC16A4	ENSBTAG00000015380
SLC22A3	ENSBTAG00000039080
SLC4A8	ENSBTAG00000017950
SLC6A7	ENSBTAG00000000910
SNCAIP	ENSBTAG00000021971
SNORA17	ENSBTAG00000042482
SNORA44	ENSBTAG00000042871
SNORA48	ENSBTAG00000042836
SNORA63	ENSBTAG00000042699
SPTBN2	ENSBTAG00000005929
SYCE1L	ENSBTAG00000023780
TCAIM	ENSBTAG00000016622
TGM2	ENSBTAG00000016208
TMEM81	ENSBTAG00000015945
TREML2	ENSBTAG00000015707
TRIM45	ENSBTAG00000001748
TSACC	ENSBTAG00000006373
TSHZ3	ENSBTAG00000002687
TTLL10	ENSBTAG00000018028
TUB	ENSBTAG00000004862
TULP3	ENSBTAG00000015879
UBE2U	ENSBTAG00000040268
VASH2	ENSBTAG00000003701
VTN	ENSBTAG00000016151
VWA7	ENSBTAG00000005630
VWCE	ENSBTAG00000021568
YDJC	ENSBTAG00000013036
ZNF165	ENSBTAG00000031874
ZNF550	ENSBTAG00000009460
ZNF599	ENSBTAG00000009895
ZNF784	ENSBTAG00000016299
[truncated: 8,920 more rows]
